# Supplementary material for: Effects of cyproheptadine on body weight gain in children with nonorganic failure to thrive in Taiwan: A hospital-based retrospective study
Source: PubMed Central journal article supplement (PMC8525746; doi:10.1371/journal.pone.0258731), 2021-10-19
Supplement: pone.0258731.s001.pdf [file pone.0258731.s001.pdf]

**S1 Table. Cyproheptadine use in underweight and/or malnourished children**

| Reference # (year) | Study design | Age (years)                                            | Sex  | Sample size (control/case) | CH dose (mg/kg/day) | CH duration (months)      | Mean weight gain (g/day) | Height velocity                       | Outcome                                                                                                                                          |
|--------------------|--------------|--------------------------------------------------------|------|----------------------------|---------------------|---------------------------|--------------------------|---------------------------------------|--------------------------------------------------------------------------------------------------------------------------------------------------|
| 11 (2009)          | RCT          | 2–10 years                                             | Both | 21 (11/10)                 | 0.1 HS              | 4                         | 11.66                    | Improvement in cases but not controls | Greater weight gain (0.7 vs. 0.1 kg) and growth (1.7 vs. 0.8 cm) at 2 months and increased appetite and IGF-1 levels in the CH vs. placebo group |
| 19 (2010)          | RCT          | 6–15 years                                             | Both | 70 (33/37)                 | 0.3 TID             | 2                         | 22.32                    | NA                                    | Significant weight gain in a CH-treated child                                                                                                    |
| 18 (2014)          | RCT          | 2–5 years                                              | Both | 77 (40/47)                 | 0.25 BID            | 1                         | 20.00                    | No improvement in cases or controls   | Higher weight in the CH vs. placebo group at 1 month (0.6 vs. 0.1 kg); no difference in weight or height at 2 months                             |
| 7 (2014)           | RS cohort    | 7 months–6 years                                       | Both | 127 (45/82)                | 0.25 BID            | Unclear                   | NA                       | NA                                    | Improvement in weight <sup>b</sup> and mealtime and feeding behaviors; CH, well tolerated overall                                                |
| Our study (2020)   | RS           | 3–11 years (girls: 3–10; boys: 3–11) prepubertal stage | Both | 788 (733/50)               | 0.3 mg TID          | 3.24 (97.22 days, 14–532) | 26.45                    | Improvement in cases                  | Higher weight gain in the CH group                                                                                                               |

RCT, randomized control study; RS, retrospective; NA, not applicable; IGF-1, insulin-like growth factor
