# Supplementary material for: Effects of cyproheptadine on body weight gain in children with nonorganic failure to thrive in Taiwan: A hospital-based retrospective study
Source: PubMed Central journal article supplement (PMC8525746; doi:10.1371/journal.pone.0258731), 2021-10-19
Supplement: pone.0258731.s002.pdf [file pone.0258731.s002.pdf]

**S2 Figure. Mean weight gain velocity in underweight and/or malnourished children with cyproheptadine hydrochloride.**

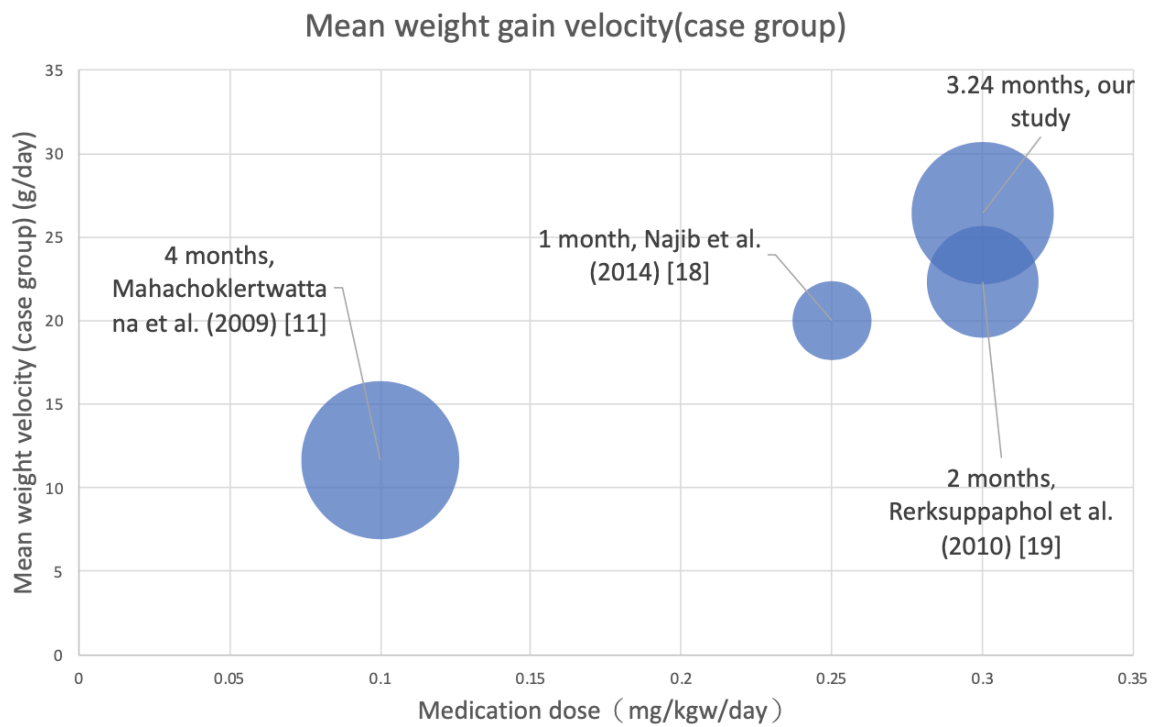

The bubble size is in proportion to medication duration.
